# Accuracy of gene expression prediction from genotype data with PrediXcan varies across diverse populations

Anna Mikhaylova<sup>1,\*</sup> and Timothy Thornton<sup>1,\*</sup>

<sup>1</sup>Department of Biostatistics, University of Washington, Seattle , WA, USA.

\*Correspondence to [avmikh@uw.edu](mailto:avmikh@uw.edu) and [tathornt@uw.edu](mailto:tathornt@uw.edu).

## Abstract

Predicting gene expression with genetic data has garnered significant attention in recent years. PrediXcan is one of the most widely used gene-based association methods for testing imputed gene expression values with a phenotype due to the invaluable insight the method has shown into the relationship between complex traits and the component of gene expression that can be attributed to genetic variation. The prediction models for PrediXcan, however, were obtained using supervised machine learning methods and training data from the Depression and Gene Network (DGN) and the Genotype-Tissue Expression (GTEx) data, where the majority of subjects are of European descent. Many genetic studies, however, include samples from multi-ethnic populations, and in this paper we assess the accuracy of gene expression predictions with PrediXcan in diverse populations. Using transcriptomic data from the GEUVADIS (Genetic European Variation in Health and Disease) RNA sequencing project and whole genome sequencing data from the 1000 Genomes project, we evaluate and compare the predictive performance of PrediXcan in an African population (Yoruban) and four European populations. Prediction results are obtained using a range of models from PrediXcan weight databases, and Pearson's correlation coefficient is used to measure prediction accuracy. We demonstrate that the predictive performance of PrediXcan varies across populations (F-test p-value < 0.001), where prediction accuracy is the worst in the Yoruban sample compared to European samples. Moreover, the performance of PrediXcan varies not only among distant populations, but also among closely related populations as well. We also find that the qualitative performance of PrediXcan for the populations considered is consistent across all weight databases used.

## 1 Introduction

In the past decade, genome-wide association studies (GWAS) have identified thousands of genetic variants significantly associated with a wide range of human phenotypes. The vast majority of these studies, however, were conducted in samples from European ancestry populations [1–5]. Differences in allele frequencies, genetic architecture, and linkage disequilibrium (LD) patterns across ancestries suggest that GWAS discoveries can fail to generalize across populations, and recent publications have provided compelling evidence that GWAS findings often do not transfer from European

34 populations to other ethnic groups. For example, Carlson et al. analyzed multi-ethnic data from  
35 the PAGE Consortium and concluded that some GWAS-identified variants from European ancestry  
36 population had different magnitude and direction of allelic effects in non-European populations  
37 and the differential effects were more persistent in African Americans [6]. Moreover, genetic risk  
38 prediction models derived from European GWAS were unreliable when applied to other ethnic  
39 groups [6]. Martin et al. examined the impact of population history on polygenic risk scores and  
40 demonstrated that they were biased and confounded by population structure. [7]. Since genetic risk  
41 prediction accuracy depends on genetic similarity between the target and discovery cohorts, Martin  
42 et al. advised against interpreting the scores across populations and recommended computing them  
43 in genetically similar cohorts.

44 Associations between genetic variation and molecular traits, such as gene expression, have  
45 advanced our understanding of the mechanisms underlying trait-variant associations [8]. Prior  
46 studies have shown that a large proportion of GWAS variants identified for complex traits are  
47 expression quantitative trait loci (eQTLs): i.e., they play a role in regulating gene expression [9].  
48 Thus, eQTLs can aid in prioritizing likely causal variants among the ones identified by GWAS,  
49 especially if they are found in non-coding regions, and uncover the mechanisms by which genotypes  
50 influence phenotypes [8]. So having three types of data – genotype, phenotype and gene expression  
51 – on the same set of subjects can be advantageous for investigating the relationships between  
52 phenotypes and genetic background of a subject and underlying processes. However, collecting all of  
53 these data types is often not feasible due to cost and tissue availability. Additionally, eQTL studies  
54 have the same pitfalls as GWASs – the majority of the detected eQTLs are not causal, but may be  
55 in LD with causal variants. Similar to variants identified through GWAS, eQTL findings might fail  
56 to replicate in diverse populations due to LD patterns that differ across populations.

57 Recently methods, such as PrediXcan, have been proposed for integrating eQTL studies and  
58 GWASs [10]. Such methods have multiple advantages over traditional GWAS methods, especially  
59 where expression data from the tissue of interest are not available and in cases when gene expression  
60 is in the causal pathway between genotypic variants and phenotype. PrediXcan can lead to an  
61 increase in power to detect associations for multiple reasons. First, it removes environmental noise  
62 and focuses on the genetically regulated component of gene expression. Second, PrediXcan bases  
63 gene expression prediction on a limited number of variants that are 1Mb upstream and downstream  
64 from the gene and then tests for association between the predicted expression and a phenotype. So,  
65 by including fewer variants that are potentially causal for every gene, the method has better power  
66 to detect eQTLs. Lastly, by conducting tests on aggregated variants instead of testing every variant,  
67 PrediXcan dramatically reduces multiple testing burden.

68 However, PrediXcan models were built using data from the Depression Genes and Networks  
69 (DGN) and the Genotype-Tissue Expression (GTEx) Project – both of which consist primarily  
70 of European-ancestry subjects. This poses the question of how accurate PrediXcan expression  
71 predictions are for non-European ancestry populations. Previous research has reported differences  
72 in gene expression levels across diverse populations from the HapMap3 project noting that 77%

73 of eQTLs are population specific and only 23% are shared between two or more populations [11].  
74 More distantly related populations have more differentially expressed genes, although this can often  
75 be explained by the expression of different gene transcripts across populations [12].

76 In this work, we investigated whether the predictive performance of PrediXcan differs across  
77 four European populations and one African populations using the Genetic European Variation in  
78 Health and Disease (GEUVADIS) [12] and 1000 Genomes Projects data [12, 13]. We predicted  
79 gene expression levels using seven PrediXcan weight databases derived from whole blood and  
80 lymphoblastoid cell lines (LCL) expression data. To test prediction accuracy across populations,  
81 we compared observed and predicted gene expression levels by calculating Pearson’s correlation  
82 coefficients and then using linear mixed models to assess significant differences. In addition, we  
83 also evaluated the utility of whole-blood-based models when making predictions for LCL expression  
84 data. The results suggests that accuracy of PrediXcan for gene expression prediction differs across  
85 populations, even among closely related European ancestry populations. Furthermore, PrediXcan  
86 prediction accuracy is the worst in Africans across all weight databases we considered.

87

## 88 2 Materials and Methods

### 89 2.1 Datasets

90 We obtained gene expression data from the GEUVADIS Consortium and whole genome sequencing  
91 data from the 1000 Genomes Project. The gene expression data consisted of RNA sequencing on  
92 lymphoblastoid cell line (LCL) samples for 464 individuals from five populations. Of these, 445  
93 subjects were in the 1000 Genomes Phase 3 dataset, including 358 subjects of European descent  
94 and 87 subjects of African descent. European samples included: Utah residents with Northern and  
95 Western European ancestry (CEU,  $n = 89$ ), British individuals in England and Scotland (GBR,  
96  $n = 86$ ), Finnish in Finland (FIN,  $n = 92$ ), and Toscani in Italy (TSI,  $n = 91$ ). African samples  
97 included individuals of African descent from Yoruba in Ibadan, Nigeria (YRI,  $n = 87$ ). Gene  
98 expression measurements were available for 23,722 genes.

99 We used seven PrediXcan weight databases: DGN whole-blood (further referred to as DGN),  
100 GTEx v6 1KG whole blood, GTEx v6 1KG LCL, GTEx v6 HapMap whole blood, GTEx v6 HapMap  
101 LCL, GTEx v7 HapMap whole blood (GTEx WB) , and GTEx v7 HapMap LCL (GTEx LCL).  
102 The databases were downloaded from <http://predictdb.org/>.

### 103 2.2 Filtering out poorly predicted genes

104 Linear regression models were used to identify genes whose predicted values are not associated with  
105 the observed values at significance level of 0.05 in order to filter out the genes with poor prediction  
106 accuracy across all subjects. For each gene, we fit a linear regression model with observed gene  
107 expression as the outcome, and predicted gene expression as the predictor of interest. We performed

108 the Wald test to assess the significance of the coefficient for each gene and excluded the genes whose  
109 corresponding p-values were above the significance level of 0.05.

110 We then calculated Pearson’s correlation coefficient,  $r$ , between observed and predicted expression  
111 values for every gene, in each population separately. A few genes had constant predicted gene  
112 expression levels across all subjects. Since we could not calculate the correlation if one of the  
113 variables was constant, we excluded those genes. Thus, for every gene we had five Pearson’s  
114 correlation coefficients, one per population. Note that we used  $r$  instead of the square of Pearson  
115 correlation,  $r^2$ , in order to take the directionality of correlation into account. Using  $r^2$  as a measure  
116 of predictive accuracy can be misleading because a large proportion of genes predicted and observed  
117 expression values that are negatively correlated.

### 118 **2.3 Prediction accuracy differences across populations and across tissues**

119 To assess how the training of prediction models with different populations affects prediction accuracy,  
120 we used a linear mixed effect model approach. After filtering out poorly predicted genes, we fit the  
121 following model:

$$r_{ij} = \beta_0 + \gamma_i + \beta_1 \mathbb{I}_{FIN,i} + \beta_2 \mathbb{I}_{GBR,i} + \beta_3 \mathbb{I}_{TSI,i} + \beta_4 \mathbb{I}_{YRI,i} + \epsilon_{ij}, \quad (1)$$

122 where  $r_{ij}$  is the correlation coefficient for gene  $i$  in population  $j$ ; and  $\mathbb{I}_{FIN,i}$ ,  $\mathbb{I}_{GBR,i}$ ,  $\mathbb{I}_{TSI,i}$ , and  
123  $\mathbb{I}_{YRI,i}$  are indicator variables that are equal to 1 if the gene correlation was calculated on the  
124 population indicated in the subscript, and otherwise are equal to 0. Thus, we modeled population as  
125 a categorical predictor, with the CEU population as a reference. To account for variation between  
126 genes, we included a random intercept  $\gamma_i$  for each gene and we assumed that  $\gamma_i \sim \mathcal{N}(0, \sigma_\gamma^2)$ . We  
127 also included an error term  $\epsilon_{ij}$ , such that  $\epsilon_{ij} \sim \mathcal{N}(0, \sigma^2)$ . To simultaneously test for differences  
128 in correlation coefficients across populations, we used repeated measures ANOVA. To assess the  
129 association between the change in correlation coefficient and population, we tested the coefficients  
130 for each population using the likelihood-ratio test.

131 We also ran an additional analysis where we excluded the CEU population due to potentially  
132 lower quality of the CEU cell lines, as reported in the literature [14, 15]. We fit a model identical to  
133 (1), excluding the CEU and using the FIN population as a reference:

$$r_{ij} = \beta_0 + \gamma_i + \beta_1 \mathbb{I}_{GBR,i} + \beta_2 \mathbb{I}_{TSI,i} + \beta_3 \mathbb{I}_{YRI,i} + \epsilon_{ij}, \quad (2)$$

134 where the notation is the same as above. Again, we performed a repeated measures ANOVA to test  
135 for differences in gene correlations across the populations and the likelihood-ratio test to separately  
136 test the change in gene correlations for each population compared to the reference population.

137 To evaluate how PrediXcan performance with whole-blood (WB) databases differed from LCL  
138 databases, we restricted the set of genes to only those that were present in both the WB and LCL  
139 databases. We compared each pair of GTEx WB and GTEx LCL databases using a paired t-test.  
140 All the statistical analyses described above were performed in R version 3.3.3.

## 141 **3 Results**

### 142 **3.1 Overview of PrediXcan weight databases**

143 In Table 1, we summarize the main features of the PrediXcan weight databases that we used in  
144 the analyses. Compared to DGN database, GTEx databases have fewer gene models and smaller  
145 training sample sizes. HapMap and 1KG-based models differ in the number of variants used for  
146 training: GTEx Hapmap models were trained on the HapMap SNP set while GTEx 1KG were  
147 trained on the 1000 Genomes SNP set, so the latter utilize more SNPs when predicting expression.  
148 While GTEx LCL databases are based on relatively small training sets, they are derived from the  
149 same tissue as the GEUVADIS RNA-seq data we analyzed. Lastly, DGN and GTEx v7 sets of  
150 weights were trained only on the Europeans samples, while GTEx v6 databases had a small fraction  
151 of non-Europeans.

152 To avoid repetition, we focus our attention on DGN, GTEx v7 WB and GTEx v7 LCL databases  
153 in the main text, and report our findings for the other four databases in the Supplementary material.

### 154 **3.2 PrediXcan prediction accuracy differs across diverse populations**

155 Using DGN, GTEx WB and GTEx LCL models and sequence data, we predicted gene expression  
156 for 10387, 5432 and 2777 genes, respectively (see Table 2). The number of genes with available  
157 predictions varied by population: the four European populations had similar counts and YRI had  
158 a slightly lower count. Because there was no variation in predicted expression values in at least  
159 one of the populations, we excluded 33 genes from DGN, 13 from GTEx WB, and 10 from GTEx  
160 LCL. From the remaining genes, we filtered out the ones with poor prediction accuracy based on  
161 associations between observed and predicted values, as described in the Materials and Methods  
162 section. Two-thirds of genes were excluded by this criteria from the genes predicted with DGN  
163 database, and slightly less than a half were excluded from gene sets predicted with the GTEx  
164 databases.

165 Next, we computed gene correlation coefficients, separately in each of the five populations. Violin  
166 plots display the correlation coefficients by population across genes before and after filtering (see  
167 Figures 1A and 1B, respectively). We note that prediction accuracy is slightly lower for the African  
168 populations than for any of the European populations, regardless of the weight database used, and  
169 this trend is even more obvious after the filtering process.

170 Afterwards, we binned the genes into six categories based on the gene correlation coefficients  
171 (see Table 3). The majority of genes have very poor prediction accuracy – of the genes predicted  
172 with whole-blood databases, a third have negative correlations and a half have correlations between  
173 0 and 0.2. Of the genes predicted with LCL, a fifth have negative correlations and over a third have  
174 correlations between 0 and 0.2. The distribution of gene correlation coefficients is fairly similar across  
175 the four European populations, although predictive accuracy seems worse in CEU compared to FIN,  
176 GBR, and TSI. The predictive accuracy is the worst in the African sample. Across all populations,  
177 only a small number of genes were predicted with high accuracy (with  $r > 0.6$ ). Furthermore, all

178 European populations have a greater number of well-predicted genes than the African population,  
179 regardless of the weight database used.

180 Next, we assessed the association between the prediction accuracy (as gene correlation coefficients)  
181 and population category via repeated measures ANOVA and linear mixed models. We present  
182 the parameter estimates and their 95% confidence intervals calculated using model-based standard  
183 errors for the model 1 in Table 4. Based on the repeated measures ANOVA, we find that prediction  
184 accuracy differs across populations, regardless of the weight database used (p-values for all databases  
185 were  $< 0.001$ ). From the linear mixed model 1, we find that the prediction accuracy is significantly  
186 higher in FIN, GBR and TSI and significantly lower in YRI, compared to CEU (all p-values  $< 0.001$ ).  
187 This suggests that predictive performance varies not only among distant populations, but also  
188 among closely related populations.

189 Finally, we repeated the analysis described above, this time excluding the CEU population. We  
190 present the parameter estimates and the corresponding 95% confidence intervals in Table 5. From  
191 the repeated measures ANOVA, we find that prediction accuracy differs across the four populations  
192 (p-values for all databases were  $< 0.001$ ). Moreover, based on the coefficients and the corresponding  
193 p-values from the linear mixed model 2, we estimate the prediction accuracy to be significantly  
194 higher in GBR and significantly lower in TSI and YRI, compared to the FIN population (see  
195 corresponding p-values in Table 5). This difference in prediction accuracy is the greatest between  
196 YRI and FIN when GTEx v7 LCL weight database was used. Like in the analysis above, we notice  
197 that predictive performance differs across populations, including European populations.

### 198 **3.3 PrediXcan prediction accuracy differs between tissues**

199 As can be seen in the violin plots in Figure 1, both databases based on whole blood perform similarly,  
200 and LCL-based database displays improved prediction accuracy. In order to compare pairwise gene  
201 correlations, we restricted our analyses to the 1,587 genes common in both GTEx v7 WB and  
202 GTEx v7 LCL. Scatter plots presented in Figure 2 suggest that the majority of genes have very  
203 similar correlation coefficients when using WB and LCL databases across all populations. However,  
204 we see more genes in the upper left corner, above the dotted line, indicating that using the LCL  
205 database results in more genes have better prediction accuracy. This result is not surprising since  
206 the expression data we used were derived from LCL. The results of the paired t-test are consistent  
207 with the visual examination of the data: the mean difference between gene correlations based on  
208 the GTEx v7 LCL model and based on the GTEx v7 WB model is 0.03 ( $p$ -value  $< 0.0001$ ), with  
209 predictions based on the LCL model having better performance.

## 210 **4 Discussion**

211 In this work, we evaluated PrediXcan performance and compared it across five geographically diverse  
212 populations using multiple weight databases. Models from all seven weight databases were trained  
213 mostly on subjects of European ancestry; three of the databases were derived from LCL and the

214 remaining four from whole blood. As a measure of prediction accuracy, we computed correlation  
215 coefficients for each gene in all populations and used the linear mixed models framework to quantify  
216 the differences in prediction performance across populations. We also investigated whether whole  
217 blood models could be used for predicting gene expression levels in LCL.

218 Overall, PrediXcan accurately predicted gene expression for some genes; however, the majority  
219 of genes had very poor correlation between measured and predicted expression levels. For almost  
220 half the genes, the correlation was negative. As expected, prediction accuracy was higher when the  
221 training and testing cohorts were of similar ancestry; i.e., models trained on Europeans performed  
222 better in the subjects of European descent and the worst in the African subjects. Surprisingly,  
223 prediction accuracy varied even among the European populations, with Finnish, British, and Italian  
224 populations having significantly higher accuracy than the CEU. These results held under all the  
225 weight databases we considered. Lastly, LCL-trained models outperformed whole-blood-trained  
226 models, although the prediction accuracy was similar for many of the genes.

227 A recent study reported consistent results to our findings and suggested that gene expression  
228 models should be trained on genetically similar populations [16]. Lack of genomic data from diverse  
229 populations limits the ability to effectively interpret and translate genomic results into clinical  
230 applications for individuals from admixed and other non-European populations. Our results in this  
231 paper emphasize the need to develop methods that account for ancestry and incorporate ancestral  
232 LD structure and allele frequencies differences. We also corroborate the importance of including  
233 more ancestrally diverse individuals in medical genomics to ensure that everyone gets the benefits  
234 of precision medicine and to avoid further exacerbating healthcare inequality.

235 We conclude this paper with some important caveats. LCLs are derived from B cells found  
236 in whole blood, and they provide a continuous supply of genetic material for GWAS and gene  
237 expression studies. However, they do undergo a transformation to become immortal that can change  
238 their biology and they do not have the same properties as native tissue [17]. Storage conditions,  
239 freeze-thaw cycles, and maturity of cell lines can also affect gene expression patterns [14,15]. The  
240 CEU cell lines were collected much earlier than the other cell lines and LCL age can have a  
241 confounding effect and bias downstream analyses [14]. This factor could have contributed to the  
242 differences in prediction accuracy among European populations. Lastly, our study had modest  
243 sample sizes and only one non-European population. Future work is needed to investigate the  
244 performance and prediction accuracy of PrediXcan and other related approaches for gene expression  
245 in other multi-ethnic and ancestrally diverse populations.

## 246 **Conflict of Interest Statement**

247 The authors declare that the research was conducted in the absence of any commercial or financial  
248 relationships that could be construed as a potential conflict of interest.

## 249 Author Contributions

250 AM and TT conceived the idea, designed the analysis, interpreted the results, and wrote the paper.  
251 AM ran the analysis.

## 252 Data Availability Statement

253 GEUVADIS expression data is available at Array Express (E- MTAB-264 and E-GEUV-1) at  
254 <https://www.ebi.ac.uk/arrayexpress/experiments/> and 1000 Genomes project genotype data  
255 is available at <http://www.internationalgenome.org/>.

## 256 Tables

Table 1: Summary of PrediXcan databases used in analyses.

| PrediXcan Database          | Training set size | Number of models | Number of SNPs used |
|-----------------------------|-------------------|------------------|---------------------|
| DGN whole blood             | 922               | 13,171           | 249,696             |
| GTEEx v6 1KG whole blood    | 338               | 6,759            | 185,786             |
| GTEEx v6 1KG LCL            | 114               | 3,759            | 125,045             |
| GTEEx v6 HapMap whole blood | 338               | 6,588            | 136,941             |
| GTEEx v6 HapMap LCL         | 114               | 3,441            | 91,237              |
| GTEEx v7 HapMap whole blood | 315               | 6,297            | 140,931             |
| GTEEx v7 HapMap LCL         | 96                | 3,045            | 88,143              |

Table 2: Number of genes for which Pearson correlation coefficients are available by population and by PrediXcan weight database.

| PrediXcan database                                  | DGN    | GTEEx v7 WB | GTEEx v7 LCL |
|-----------------------------------------------------|--------|-------------|--------------|
| Genes with observed and predicted expression values | 10,387 | 5,432       | 2,777        |
| By population:                                      |        |             |              |
| CEU                                                 | 10,385 | 5,432       | 2,777        |
| FIN                                                 | 10,385 | 5,432       | 2,777        |
| GBR                                                 | 10,385 | 5,432       | 2,777        |
| TSI                                                 | 10,385 | 5,432       | 2,776        |
| YRI                                                 | 10,354 | 5,419       | 2,767        |
| Genes before filtering                              | 10,354 | 5,419       | 2,767        |
| Genes after filtering                               | 3,493  | 2,288       | 1,699        |



Table 3: Binned gene correlation coefficients for the five populations using DGN, GTEx WB and GTEx LCL weight databases.

|                      | Unfiltered |       |       |       |       | Filtered |       |       |       |       |
|----------------------|------------|-------|-------|-------|-------|----------|-------|-------|-------|-------|
|                      | CEU        | FIN   | GBR   | TSI   | YRI   | CEU      | FIN   | GBR   | TSI   | YRI   |
| DGN database         |            |       |       |       |       |          |       |       |       |       |
| $r < 0$              | 3,583      | 3,491 | 3,480 | 3,587 | 4,156 | 561      | 547   | 554   | 585   | 911   |
| $0 < r < 0.2$        | 5,107      | 4,976 | 4,812 | 4,954 | 5,001 | 1,533    | 1,379 | 1,258 | 1,409 | 1,674 |
| $0.2 < r < 0.4$      | 1,359      | 1,480 | 1,589 | 1,434 | 1,016 | 1,097    | 1,162 | 1,209 | 1,121 | 728   |
| $0.4 < r < 0.6$      | 239        | 302   | 354   | 290   | 147   | 236      | 300   | 353   | 289   | 146   |
| $0.6 < r < 0.8$      | 56         | 93    | 105   | 75    | 31    | 56       | 93    | 105   | 75    | 31    |
| $0.8 < r < 1$        | 10         | 12    | 14    | 14    | 3     | 10       | 12    | 14    | 14    | 3     |
| GTEx v7 WB database  |            |       |       |       |       |          |       |       |       |       |
| $r < 0$              | 1,756      | 1,621 | 1,622 | 1,684 | 2,101 | 336      | 309   | 314   | 335   | 590   |
| $0 < r < 0.2$        | 2,471      | 2,450 | 2,366 | 2,456 | 2,491 | 877      | 786   | 732   | 820   | 993   |
| $0.2 < r < 0.4$      | 902        | 958   | 981   | 901   | 668   | 788      | 804   | 793   | 758   | 546   |
| $0.4 < r < 0.6$      | 210        | 282   | 329   | 278   | 117   | 207      | 281   | 328   | 275   | 117   |
| $0.6 < r < 0.8$      | 69         | 93    | 100   | 85    | 38    | 69       | 93    | 100   | 85    | 38    |
| $0.8 < r < 1$        | 11         | 15    | 21    | 15    | 4     | 11       | 15    | 21    | 15    | 4     |
| GTEx v7 LCL database |            |       |       |       |       |          |       |       |       |       |
| $r < 0$              | 546        | 488   | 484   | 509   | 774   | 80       | 69    | 55    | 69    | 274   |
| $0 < r < 0.2$        | 1,119      | 1,031 | 996   | 1,050 | 1,296 | 560      | 443   | 426   | 477   | 777   |
| $0.2 < r < 0.4$      | 718        | 742   | 761   | 736   | 510   | 675      | 681   | 692   | 681   | 461   |
| $0.4 < r < 0.6$      | 293        | 361   | 369   | 360   | 145   | 293      | 361   | 369   | 360   | 145   |
| $0.6 < r < 0.8$      | 80         | 126   | 137   | 96    | 38    | 80       | 126   | 137   | 96    | 38    |
| $0.8 < r < 1$        | 11         | 19    | 20    | 16    | 4     | 11       | 19    | 20    | 16    | 4     |

Table 4: Results from linear mixed models for population category (with CEU as a reference) and change in gene correlation coefficient among filtered genes.

|     | DGN      |                  |         | GTEx v7 WB |                  |         | GTEx v7 LCL |                  |         |
|-----|----------|------------------|---------|------------|------------------|---------|-------------|------------------|---------|
|     | Estimate | 95% CI           | p-value | Estimate   | 95% CI           | p-value | Estimate    | 95% CI           | p-value |
| FIN | 0.019    | (0.014, 0.025)   | < 0.001 | 0.021      | (0.015, 0.028)   | < 0.001 | 0.038       | (0.030, 0.046)   | < 0.001 |
| GBR | 0.029    | (0.023, 0.034)   | < 0.001 | 0.032      | (0.025, 0.039)   | < 0.001 | 0.051       | (0.043, 0.059)   | < 0.001 |
| TSI | 0.010    | (0.004, 0.016)   | < 0.001 | 0.013      | (0.007, 0.020)   | < 0.001 | 0.027       | (0.019, 0.035)   | < 0.001 |
| YRI | -0.054   | (-0.059, -0.048) | < 0.001 | -0.070     | (-0.077, -0.063) | < 0.001 | -0.097      | (-0.105, -0.089) | < 0.001 |

Table 5: Results from linear mixed models for population category (excluding CEU, with FIN as a reference) and change in gene correlation coefficient among filtered genes.

|     | DGN      |                  |         | GTEx v7 WB |                  |         | GTEx v7 LCL |                  |         |
|-----|----------|------------------|---------|------------|------------------|---------|-------------|------------------|---------|
|     | Estimate | 95% CI           | p-value | Estimate   | 95% CI           | p-value | Estimate    | 95% CI           | p-value |
| GBR | 0.010    | (0.004, 0.015)   | < 0.001 | 0.011      | (0.004, 0.018)   | 0.003   | 0.013       | (0.005, 0.021)   | 0.002   |
| TSI | -0.009   | (-0.015, -0.003) | 0.002   | -0.008     | (-0.015, -0.001) | 0.028   | -0.011      | (-0.019, -0.003) | 0.009   |
| YRI | -0.073   | (-0.079, -0.067) | < 0.001 | -0.091     | (-0.098, -0.084) | < 0.001 | -0.134      | (-0.143, -0.126) | < 0.001 |

257 **Figure captions**

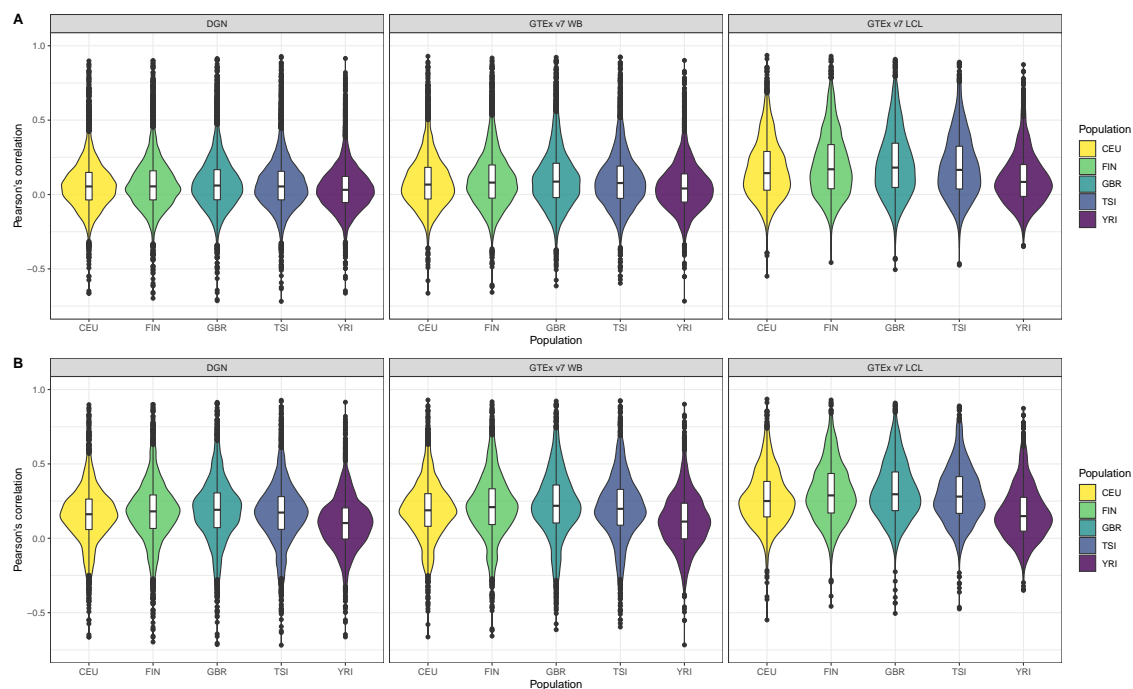

Figure 1: Violin plots of gene expression correlation coefficients by five populations using DGN, GTEx v7 WB and GTEx v7 LCL weight databases; **(A)** before and **(B)** after filtering out poorly predicted genes.

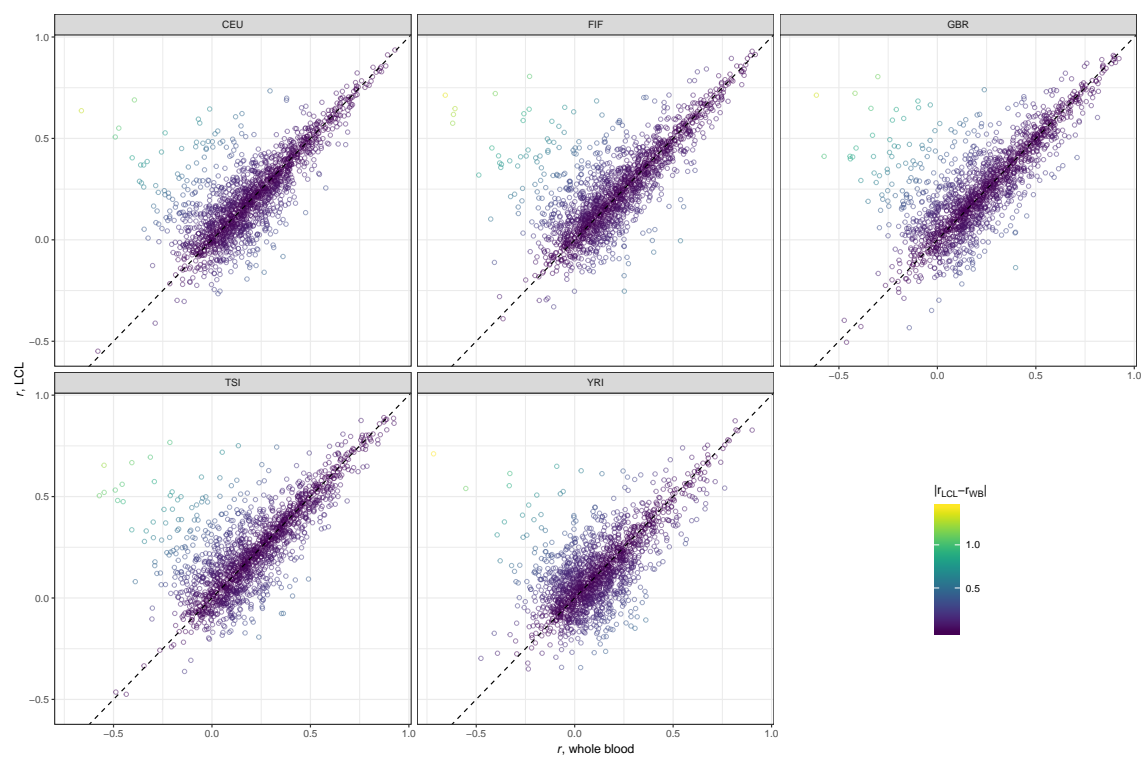

Figure 2: Scatter plots comparing gene correlation coefficients by population using GTEx v7 LCL vs GTEx v7 WB databases.

## References

- 258
- 259 [1] A. C. Need and D. B. Goldstein, “Next generation disparities in human genomics: concerns  
260 and remedies,” *Trends in Genetics*, vol. 25, no. 11, pp. 489–494, 2009.
- 261 [2] C. D. Bustamante, E. G. Burchard, and F. M. De la Vega, “Genomics for the world.,” *Nature*,  
262 vol. 475, no. 14 July, pp. 163–165, 2011.
- 263 [3] S. Petrovski and D. B. Goldstein, “Unequal representation of genetic variation across ancestry  
264 groups creates healthcare inequality in the application of precision medicine,” *Genome Biology*,  
265 vol. 17, no. 1, p. 157, 2016.
- 266 [4] A. B. Popejoy and S. M. Fullerton, “Genomics is failing on diversity,” *Nature*, vol. 538, no. 7624,  
267 pp. 161–164, 2016.
- 268 [5] L. A. Hindorff, V. L. Bonham, L. C. Brody, M. E. Ginoza, C. M. Hutter, T. A. Manolio, and  
269 E. D. Green, “Prioritizing diversity in human genomics research,” *Nature Reviews Genetics*,  
270 vol. 19, no. 3, pp. 175–185, 2018.
- 271 [6] C. S. Carlson, T. C. Matise, K. E. North, C. A. Haiman, M. D. Fesinmeyer, S. Buyske,  
272 F. R. Schumacher, U. Peters, N. Franceschini, M. D. Ritchie, D. J. Duggan, K. L. Spencer,  
273 L. Dumitrescu, C. B. Eaton, F. Thomas, A. Young, C. Carty, G. Heiss, L. Le Marchand, D. C.  
274 Crawford, L. A. Hindorff, and C. L. Kooperberg, “Generalization and Dilution of Association  
275 Results from European GWAS in Populations of Non-European Ancestry: The PAGE Study,”  
276 *PLoS Biology*, vol. 11, no. 9, 2013.
- 277 [7] A. R. Martin, C. R. Gignoux, R. K. Walters, G. L. Wojcik, B. M. Neale, S. Gravel, M. J. Daly,  
278 C. D. Bustamante, and E. E. Kenny, “Human Demographic History Impacts Genetic Risk  
279 Prediction across Diverse Populations,” *American Journal of Human Genetics*, vol. 100, no. 4,  
280 pp. 635–649, 2017.
- 281 [8] F. W. Albert and L. Kruglyak, “The role of regulatory variation in complex traits and disease,”  
282 *Nature Reviews Genetics*, vol. 16, no. 4, pp. 197–212, 2015.
- 283 [9] D. L. Nicolae, E. Gamazon, W. Zhang, S. Duan, M. Eileen Dolan, and N. J. Cox, “Trait-  
284 associated SNPs are more likely to be eQTLs: Annotation to enhance discovery from GWAS,”  
285 *PLoS Genetics*, vol. 6, no. 4, 2010.
- 286 [10] E. R. Gamazon, H. E. Wheeler, K. P. Shah, S. V. Mozaffari, K. Aquino-Michaels, R. J. Carroll,  
287 A. E. Eyler, J. C. Denny, D. L. Nicolae, N. J. Cox, and H. K. Im, “A gene-based association  
288 method for mapping traits using reference transcriptome data,” *Nature Genetics*, vol. 47, no. 9,  
289 pp. 1091–1098, 2015.
- 290 [11] B. E. Stranger, S. B. Montgomery, A. S. Dimas, L. Parts, O. Stegle, C. E. Ingle, M. Sekowska,  
291 G. D. Smith, D. Evans, M. Gutierrez-Arcelus, A. Price, T. Raj, J. Nisbett, A. C. Nica, C. Beazley,

- 292 R. Durbin, P. Deloukas, and E. T. Dermitzakis, “Patterns of Cis regulatory variation in diverse  
293 human populations,” *PLoS Genetics*, vol. 8, no. 4, 2012.
- 294 [12] T. Lappalainen, M. Sammeth, M. R. Friedländer, P. A. ’T Hoen, J. Monlong, M. A. Rivas,  
295 M. González-Porta, N. Kurbatova, T. Griebel, P. G. Ferreira, M. Barann, T. Wieland, L. Greger,  
296 M. Van Iterson, J. Almlöf, P. Ribeca, I. Pulyakhina, D. Esser, T. Giger, A. Tikhonov, M. Sultan,  
297 G. Bertier, D. G. Macarthur, M. Lek, E. Lizano, H. P. Buermans, I. Padioleau, T. Schwarzmayr,  
298 O. Karlberg, H. Ongen, H. Kilpinen, S. Beltran, M. Gut, K. Kahlem, V. Amstislavskiy, O. Stegle,  
299 M. Pirinen, S. B. Montgomery, P. Donnelly, M. I. McCarthy, P. Flicek, T. M. Strom, H. Lehrach,  
300 S. Schreiber, R. Sudbrak, Á. Carracedo, S. E. Antonarakis, R. Häsler, A. C. Syvänen, G. J.  
301 Van Ommen, A. Brazma, T. Meitinger, P. Rosenstiel, R. Guigó, I. G. Gut, X. Estivill, and  
302 E. T. Dermitzakis, “Transcriptome and genome sequencing uncovers functional variation in  
303 humans,” *Nature*, vol. 501, no. 7468, pp. 506–511, 2013.
- 304 [13] A. Auton, G. R. Abecasis, D. M. Altshuler, R. M. Durbin, D. R. Bentley, A. Chakravarti, A. G.  
305 Clark, P. Donnelly, E. E. Eichler, P. Flicek, S. B. Gabriel, R. A. Gibbs, E. D. Green, M. E.  
306 Hurles, B. M. Knoppers, J. O. Korb, E. S. Lander, C. Lee, H. Lehrach, E. R. Mardis, G. T.  
307 Marth, G. A. McVean, D. A. Nickerson, J. P. Schmidt, S. T. Sherry, J. Wang, R. K. Wilson,  
308 E. Boerwinkle, H. Doddapaneni, Y. Han, V. Korchina, C. Kovar, S. Lee, D. Muzny, J. G. Reid,  
309 Y. Zhu, Y. Chang, Q. Feng, X. Fang, X. Guo, M. Jian, H. Jiang, X. Jin, T. Lan, G. Li, J. Li,  
310 Y. Li, S. Liu, X. Liu, Y. Lu, X. Ma, M. Tang, B. Wang, G. Wang, H. Wu, R. Wu, X. Xu,  
311 Y. Yin, D. Zhang, W. Zhang, J. Zhao, M. Zhao, X. Zheng, N. Gupta, N. Gharani, L. H. Toji,  
312 N. P. Gerry, A. M. Resch, J. Barker, L. Clarke, L. Gil, S. E. Hunt, G. Kelman, E. Kulesha,  
313 R. Leinonen, W. M. McLaren, R. Radhakrishnan, A. Roa, D. Smirnov, R. E. Smith, I. Streeter,  
314 A. Thormann, I. Toneva, B. Vaughan, X. Zheng-Bradley, R. Grocock, S. Humphray, T. James,  
315 Z. Kingsbury, R. Sudbrak, M. W. Albrecht, V. S. Amstislavskiy, T. A. Borodina, M. Lienhard,  
316 F. Mertes, M. Sultan, B. Timmermann, M. L. Yaspo, L. Fulton, V. Ananiev, Z. Belaia,  
317 D. Beloslyudtsev, N. Bouk, C. Chen, D. Church, R. Cohen, C. Cook, J. Garner, T. Hefferon,  
318 M. Kimelman, C. Liu, J. Lopez, P. Meric, C. O’Sullivan, Y. Ostapchuk, L. Phan, S. Ponomarov,  
319 V. Schneider, E. Shekhtman, K. Sirotkin, D. Slotka, H. Zhang, S. Balasubramaniam, J. Burton,  
320 P. Danecek, T. M. Keane, A. Kolb-Kokocinski, S. McCarthy, J. Stalker, M. Quail, C. J. Davies,  
321 J. Gollub, T. Webster, B. Wong, Y. Zhan, C. L. Campbell, Y. Kong, A. Marcketta, F. Yu,  
322 L. Antunes, M. Bainbridge, A. Sabo, Z. Huang, L. J. Coin, L. Fang, Q. Li, Z. Li, H. Lin,  
323 B. Liu, R. Luo, H. Shao, Y. Xie, C. Ye, C. Yu, F. Zhang, H. Zheng, H. Zhu, C. Alkan, E. Dal,  
324 F. Kahveci, E. P. Garrison, D. Kural, W. P. Lee, W. F. Leong, M. Stromberg, A. N. Ward,  
325 J. Wu, M. Zhang, M. J. Daly, M. A. DePristo, R. E. Handsaker, E. Banks, G. Bhatia, G. Del  
326 Angel, G. Genovese, H. Li, S. Kashin, S. A. McCarroll, J. C. Nemes, R. E. Poplin, S. C.  
327 Yoon, J. Lihm, V. Makarov, S. Gottipati, A. Keinan, J. L. Rodriguez-Flores, T. Rausch, M. H.  
328 Fritz, A. M. Stütz, K. Beal, A. Datta, J. Herrero, G. R. Ritchie, D. Zerbino, P. C. Sabeti,  
329 I. Shlyakhter, S. F. Schaffner, J. Vitti, D. N. Cooper, E. V. Ball, P. D. Stenson, B. Barnes,

330 M. Bauer, R. K. Cheetham, A. Cox, M. Eberle, S. Kahn, L. Murray, J. Peden, R. Shaw, E. E.  
331 Kenny, M. A. Batzer, M. K. Konkel, J. A. Walker, D. G. MacArthur, M. Lek, R. Herwig,  
332 L. Ding, D. C. Koboldt, D. Larson, K. Ye, S. Gravel, A. Swaroop, E. Chew, T. Lappalainen,  
333 Y. Erlich, M. Gymrek, T. F. Willems, J. T. Simpson, M. D. Shriver, J. A. Rosenfeld, C. D.  
334 Bustamante, S. B. Montgomery, F. M. De La Vega, J. K. Byrnes, A. W. Carroll, M. K.  
335 DeGorter, P. Lacroute, B. K. Maples, A. R. Martin, A. Moreno-Estrada, S. S. Shringarpure,  
336 F. Zakharia, E. Halperin, Y. Baran, E. Cerveira, J. Hwang, A. Malhotra, D. Plewczynski,  
337 K. Radew, M. Romanovitch, C. Zhang, F. C. Hyland, D. W. Craig, A. Christoforides, N. Homer,  
338 T. Izatt, A. A. Kurdoglu, S. A. Sinari, K. Squire, C. Xiao, J. Sebat, D. Antaki, M. Gujral,  
339 A. Noor, K. Ye, E. G. Burchard, R. D. Hernandez, C. R. Gignoux, D. Haussler, S. J. Katzman,  
340 W. J. Kent, B. Howie, A. Ruiz-Linares, E. T. Dermitzakis, S. E. Devine, H. M. Kang, J. M.  
341 Kidd, T. Blackwell, S. Caron, W. Chen, S. Emery, L. Fritsche, C. Fuchsberger, G. Jun, B. Li,  
342 R. Lyons, C. Scheller, C. Sidore, S. Song, E. Sliwerska, D. Taliun, A. Tan, R. Welch, M. K.  
343 Wing, X. Zhan, P. Awadalla, A. Hodgkinson, Y. Li, X. Shi, A. Quitadamo, G. Lunter, J. L.  
344 Marchini, S. Myers, C. Churchhouse, O. Delaneau, A. Gupta-Hinch, W. Kretschmar, Z. Iqbal,  
345 I. Mathieson, A. Menelaou, A. Rimmer, D. K. Xifara, T. K. Oleksyk, Y. Fu, X. Liu, M. Xiong,  
346 L. Jorde, D. Witherspoon, J. Xing, B. L. Browning, S. R. Browning, F. Hormozdiari, P. H.  
347 Sudmant, E. Khurana, C. Tyler-Smith, C. A. Albers, Q. Ayub, Y. Chen, V. Colonna, L. Jostins,  
348 K. Walter, Y. Xue, M. B. Gerstein, A. Abyzov, S. Balasubramanian, J. Chen, D. Clarke, Y. Fu,  
349 A. O. Harmani, M. Jin, D. Lee, J. Liu, X. J. Mu, J. Zhang, Y. Zhang, C. Hartl, K. Shakir,  
350 J. Degenhardt, S. Meiers, B. Raeder, F. P. Casale, O. Stegle, E. W. Lameijer, I. Hall, V. Bafna,  
351 J. Michaelson, E. J. Gardner, R. E. Mills, G. Dayama, K. Chen, X. Fan, Z. Chong, T. Chen,  
352 M. J. Chaisson, J. Huddleston, M. Malig, B. J. Nelson, N. F. Parrish, B. Blackburne, S. J.  
353 Lindsay, Z. Ning, Y. Zhang, H. Lam, C. Sisú, D. Challis, U. S. Evani, J. Lu, U. Nagaswamy,  
354 J. Yu, W. Li, L. Habegger, H. Yu, F. Cunningham, I. Dunham, K. Lage, J. B. Jaspersen,  
355 H. Horn, D. Kim, R. Desalle, A. Narechania, M. A. Sayres, F. L. Mendez, G. D. Poznik, P. A.  
356 Underhill, D. Mittelman, R. Banerjee, M. Cerezo, T. W. Fitzgerald, S. Louzada, A. Massaia,  
357 F. Yang, D. Kalra, W. Hale, X. Dan, K. C. Barnes, C. Beiswanger, H. Cai, H. Cao, B. Henn,  
358 D. Jones, J. S. Kaye, A. Kent, A. Kerasidou, R. Mathias, P. N. Ossorio, M. Parker, C. N. Rotimi,  
359 C. D. Royal, K. Sandoval, Y. Su, Z. Tian, S. Tishkoff, M. Via, Y. Wang, H. Yang, L. Yang,  
360 J. Zhu, W. Bodmer, G. Bedoya, Z. Cai, Y. Gao, J. Chu, L. Peltonen, A. Garcia-Montero,  
361 A. Orfao, J. Dutil, J. C. Martinez-Cruzado, R. A. Mathias, A. Hennis, H. Watson, C. McKenzie,  
362 F. Qadri, R. LaRocque, X. Deng, D. Asogun, O. Folarin, C. Happi, O. Omoniwa, M. Stremlau,  
363 R. Tariyal, M. Jallow, F. S. Joof, T. Corrah, K. Rockett, D. Kwiatkowski, J. Kooner, T. T.  
364 Hien, S. J. Dunstan, N. ThuyHang, R. Fonnies, R. Garry, L. Kanneh, L. Moses, J. Schieffelin,  
365 D. S. Grant, C. Gallo, G. Poletti, D. Saleheen, A. Rasheed, L. D. Brooks, A. L. Felsenfeld, J. E.  
366 McEwen, Y. Vaydylevich, A. Duncanson, M. Dunn, and J. A. Schloss, “A global reference for  
367 human genetic variation,” *Nature*, vol. 526, no. 7571, pp. 68–74, 2015.

368 [14] Y. Yuan, L. Tian, D. Lu, and S. Xu, “Analysis of Genome-Wide RNA-Sequencing Data

- 369 Suggests Age of the CEPH/Utah (CEU) Lymphoblastoid Cell Lines Systematically Biases  
370 Gene Expression Profiles,” *Scientific Reports*, vol. 5, pp. 1–5, 2015.
- 371 [15] M. Çalkan, J. K. Pritchard, C. Ober, and Y. Gilad, “The Effect of Freeze-Thaw Cycles on Gene  
372 Expression Levels in Lymphoblastoid Cell Lines,” *PLoS ONE*, vol. 9, no. 9, p. e107166, 2014.
- 373 [16] L. S. Mogil, A. Andaleon, A. Badalamenti, S. P. Dickinson, X. Guo, J. I. Rotter, W. C. Johnson,  
374 H. K. Im, Y. Liu, and H. E. Wheeler, “Genetic architecture of gene expression traits across  
375 diverse populations Author summary,” *PLoS Genetics*, pp. 1–17, 2018.
- 376 [17] D. E. Kelly, M. E. Hansen, and S. A. Tishkoff, “Global variation in gene expression and the  
377 value of diverse sampling,” *Current Opinion in Systems Biology*, vol. 1, pp. 102–108, 2017.
